# Supplementary material for: Wnt/β-Catenin Signaling Contributes to Paclitaxel Resistance in Bladder Cancer Cells with Cancer Stem Cell-Like Properties
Source: MDPI journal article supplement (doi:10.3390/ijms23010450), 2021-12-31
Supplement: s1 [file s1]

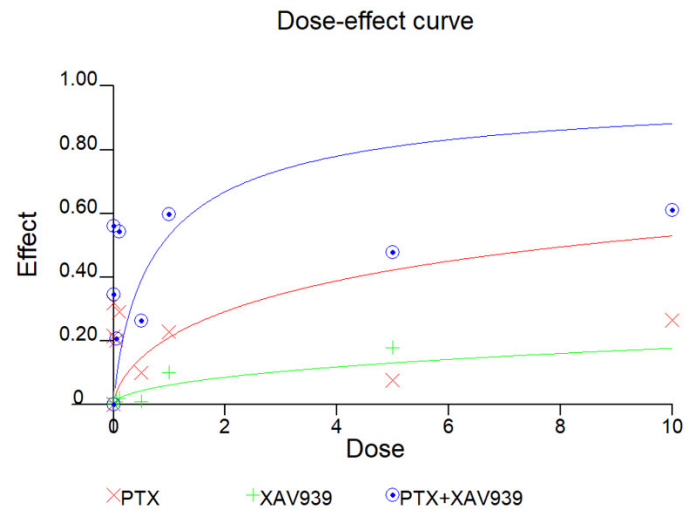

**Figure S1.** Calculation of combination index (CI) of combined treatment of paclitaxel (PTX) and XAV939 in bladder cancer cell line HT1197 using Calcosyn. Dose-effect curve for HT1197 cells, with a CI of 0.10685.
